1 How effective are UK-based support interventions and services  
2 targeted at adults who have experienced domestic and sexual  
3 violence and abuse at improving their safety and wellbeing? A  
4 systematic review protocol.

5 Sophie Carlisle<sup>1</sup>, Annie Bunce<sup>2</sup>, Matthew Prina<sup>3</sup>, Sally McManus<sup>2,4</sup>, Estela Barbosa<sup>2</sup>, Gene  
6 Feder<sup>5</sup>, Natalia Lewis<sup>5</sup>

7 Author affiliations:

8 1 Department of Health Service and Population Research, Institute of Psychiatry,

9 Psychology and Neuroscience, King's College London, De Crespigny Park, London, UK

10 2 Violence and Society Centre, City, University of London, London, UK

11 3 Population Health Sciences Institute, Faculty of Medical Sciences, Newcastle University,  
12 Newcastle, NE4 5PL, UK

13 4 National Centre for Social Research, London, UK

14 5 Centre for Academic Primary Care, Bristol Medical School, University of Bristol, Bristol  
15 BS8 2PS, UK

16

17 **Abstract**

18 **Background**

19 Domestic and sexual violence and abuse (DSVA) is prevalent in the UK, with wide-ranging  
20 impacts both on individuals and society. However, to date, there has been no systematic  
21 synthesis of the evidence for the effectiveness of UK-based support interventions and  
22 services for victim-survivors of DSVA. This review will aim to systematically collate,  
23 synthesise and quality assess the evidence regarding the effectiveness of UK support  
24 interventions and services targeted at those who have experienced DSVA. The review will

**NOTE: This preprint reports new research that has not been certified by peer review and should not be used to guide clinical practice.**

25 use findings of a preliminary scoping review, as well as input from stakeholders representing  
26 domestic and sexual violence third sector organisations to identify and prioritise the most  
27 relevant outcomes to focus on.

## 28 Methods

29 We will undertake a systematic search for peer-reviewed literature in MEDLINE, EMBASE,  
30 PsycINFO, Social Policy and Practice, Applied Social Sciences Index and Abstracts  
31 (ASSIA), International Bibliography of the Social Sciences (IBSS), Sociological abstracts and  
32 SSCI. Grey literature will be identified by searching grey literature databases, circulating a  
33 call for evidence to local and national DSVAs charities and organisations, and targeted  
34 website searching. Two reviewers will independently perform study selection and quality  
35 appraisal, with data extraction undertaken by one reviewer and checked for accuracy by a  
36 second reviewer. Narrative synthesis will be conducted, with meta-analysis if possible.

## 37 Discussion

38 Existing individual studies and evaluations have reported positive impacts of support  
39 interventions and services for those who have experienced DSVAs. Thus, it is expected that  
40 this review and synthesis will provide robust and conclusive evidence of these effects. It will  
41 also allow comparisons to be made between different types of support interventions and  
42 services, to inform policy makers and funders regarding the most effective ways of reducing  
43 domestic and sexual violence and abuse and its impacts.

44

45

46

47

## 48 Introduction

49 Domestic and sexual violence and abuse (DSVA; see Appendix 1 for glossary definition) is a  
50 prevalent international public health issue, disproportionately affecting women and girls.

51 Domestic abuse has been estimated to affect 1 in 3 women and 1 in 7 men in England and  
52 Wales in their lifetimes [1], and nearly 1 in 4 women and 1 in 20 men have been victim to  
53 some form of sexual assault since the age of 16 [2]. Whilst already high, these are likely to  
54 be underestimates, with social stigma [3] and the context the survey is delivered in [4]  
55 influencing estimates. Whilst data on perpetrators are not routinely collected in the UK  
56 currently, several cross-sectional studies have investigated this, with 20% of men reporting  
57 perpetration of intimate partner violence and abuse by the age of 21 years in one UK study  
58 [5], and another multi-country study reporting prevalences of intimate partner violence  
59 perpetration by men aged 18-49 years that ranged from 25.4% in rural Indonesia to 80% in  
60 Papua New Guinea [6]. The adverse impacts of DSVA are plentiful and varied both for those  
61 experiencing DSVA, and for the wider society. DSVA affects physical health [7-13], mental  
62 health [4, 14-16], financial stability, employment, education [17], homelessness [18],  
63 relationships, and substance dependence [19]. DSVA also puts significant demand on  
64 services, such as the criminal justice system [20], health and social services [21] and police  
65 [22]. Collectively, the total cost of domestic abuse for society considering all of these  
66 consequences has been estimated at approximately £66 billion over a one-year period [23].

67

68 Support services and interventions play an essential role in meeting the diverse needs of  
69 those affected by DSVA. These may include refuges, advocacy, referral, outreach,  
70 counselling, financial or legal advice, and helplines, to name a few. In the UK, such services  
71 and interventions are often provided by third sector organisations, however, they may also  
72 be located in both the public and private sector. Evidence from previous systematic reviews  
73 of the global evidence, focusing on one or more of these interventions and services suggests  
74 that they are effective in providing support. For instance, housing interventions have been

75 found to improve mental health and perceived safety and reduce stress [24], and economic  
76 interventions have been shown to reduce levels of domestic violence and increases in  
77 empowerment [25]. Similarly, a review of advocacy interventions showed improvements  
78 quality of life and depression [26], whilst a review of psychological therapies showed benefits  
79 in terms of depression and anxiety [27]. Reviews of perpetrator programmes (i.e.,  
80 interventions targeted at people who use violence) have also shown some benefits in terms  
81 of reduction in the perpetration and experience of abusive behaviours [28, 29]. Thus, there  
82 is some existing evidence that support interventions and services lead to improvements in a  
83 range of outcomes. Whilst the exact mechanisms through which these changes occur are  
84 unclear, it may be related to the provision of resources, whether that be practical (i.e.,  
85 housing, financial support), psychological (i.e., increased coping and resilience, space to  
86 process trauma) or informational (i.e., information about other services, available options,  
87 and next steps). Together, these may improve mental health, wellbeing, and feelings of  
88 empowerment, enabling those experiencing DSVAs to be in a better position to achieve their  
89 own goals [30, 31] and live a life free from abuse.

90  
91 However, whilst the effectiveness of such interventions and services have been evaluated  
92 separately, to date no review has assessed the evidence for support interventions and  
93 services in the UK as a whole. One issue facing such a synthesis is the wide-ranging  
94 outcomes used to assess effectiveness. A core outcome set across services and  
95 intervention types has not been agreed, and currently many different outcomes and outcome  
96 measures are being used. Indeed, we recently undertook a scoping review of all  
97 effectiveness outcomes used in studies and evaluations of support interventions and  
98 services for people with experience of DSVAs and found a total of 426 outcomes across 80  
99 studies, with only 46.9% used more than once [32]. The outcome measure used most  
100 frequently by the included studies was the cessation of abuse, a proxy measure of safety,  
101 most commonly assessed using the Severity of Abuse Grid [33]. Presence of abuse, severity

102 of abuse (also proxy measures of safety) and self-esteem measured by the Rosenberg Self-  
103 Esteem Scale were also identified as commonly reported outcomes.

104

## 105 Objectives

106 The aim of this review is to synthesise the evidence of the effectiveness of support services  
107 and interventions for people experiencing DSVAs on safety and wellbeing, specifically  
108 focusing on outcomes identified by in the scoping review and by our stakeholder advisory  
109 group. In doing so, we hope to identify which interventions and services are most likely to  
110 benefit those who have experienced DSVAs in these areas. This may be particularly helpful  
111 for third sector organisations with limited funding to maximise their benefit, and provide  
112 evidence to support future funding applications. The identification of efficacious interventions  
113 and services may also encourage greater investment from external funders and inform future  
114 cost-benefit analyses to provide further justification. Finally, this review will identify gaps in  
115 the evidence where effectiveness studies or evaluations are needed, and if/where higher  
116 quality studies of the effectiveness of specific types of services or interventions are needed.

117

## 118 Review question

- 119 1. How effective are UK-based support interventions and services (targeted at  
120 adults of any gender who have experienced DSVAs) at improving safety and  
121 wellbeing?

122

## 123 Methods and analysis

124 This protocol follows the Preferred Reporting Items for Systematic Review and Meta-  
125 Analysis Protocols (PRISMA) checklist (Appendix 2) [34]. The systematic review will follow  
126 PRISMA guidelines [35]. The protocol has been registered on Prospero: CRD42022339739.

127

128 Eligibility criteria

129 We will select intervention studies according to the following criteria (Table 1).

130

131 Table 1. Inclusion criteria

| PICOS        | Inclusion criteria                                                                                                                                                                                                                                                                                                                                                                                                                                                                                                                                                                                                                                         |
|--------------|------------------------------------------------------------------------------------------------------------------------------------------------------------------------------------------------------------------------------------------------------------------------------------------------------------------------------------------------------------------------------------------------------------------------------------------------------------------------------------------------------------------------------------------------------------------------------------------------------------------------------------------------------------|
| Population   | Adults (16 years or older) who have experienced DSVAs; adults who have perpetrated DSVAs                                                                                                                                                                                                                                                                                                                                                                                                                                                                                                                                                                   |
| Intervention | Support interventions and services, such as: housing support (including refuges, housing workers, resettlement, floating support); community based support (including outreach); advocacy (including Independent Domestic Violence Advisors (IDVAs), advice, safety planning, advocacy); psychosocial support/recovery work (including support groups, counselling, befriending, group work programmes); open access support (including referral, helplines, drop-ins, online chat services); legal support; financial support (including debt management, help accessing benefit services); combinations.<br><br>Perpetrator programmes (see Appendix 1). |
| Comparison   | Each other (i.e., advocacy vs outreach); no intervention or service; usual care                                                                                                                                                                                                                                                                                                                                                                                                                                                                                                                                                                            |
| Outcomes     | Safety (e.g., cessation of abuse, presence of abuse, severity of abuse)<br>Wellbeing (e.g., self-esteem)                                                                                                                                                                                                                                                                                                                                                                                                                                                                                                                                                   |
| Study Design | Any interventional study design (randomised controlled trial, non-randomised comparative trial, pre-post-intervention studies)                                                                                                                                                                                                                                                                                                                                                                                                                                                                                                                             |
| Setting      | UK-based                                                                                                                                                                                                                                                                                                                                                                                                                                                                                                                                                                                                                                                   |

132

133 *Population*

134 Adults of any gender who have experienced DSVa, or who have perpetrated DSVa. Adults  
135 are defined as those aged 16 years and older, in line with the definition used in the National  
136 Institute for Health and Care Excellence quality standard [36]. It should be noted that in this  
137 review we use the term ‘people who have experienced DSVa’, however due to different  
138 terminology preferences between organisations within the third sector, this may also be used  
139 interchangeably to mean victims of DSVa, survivors of DSVa, and victim-survivors. We are  
140 not placing a limit on time since the experience of violence, so long as participants accessed  
141 an intervention or service as an adult.

142

143 If the population of a study is mixed (e.g., studies that include a mix of individuals who have  
144 experienced DSVa and a form of violence other than DSVa), the study will only be included  
145 if the proportion of participants meeting the inclusion criteria is more than 50%, or if  
146 outcomes are reported separately for the populations.

147

148 In this review, domestic violence and abuse (DVA) has been defined according to both the  
149 UK cross-governmental (2013) [37] and the Domestic Abuse Act 2021 [38] definitions.  
150 Definitions of sexual violence and abuse (SVA) that will be covered by this review include  
151 the definitions given by the Istanbul Convention (Article 36) [39], the World Health  
152 Organisation [40] and the Rome Statute of the International Criminal Court’s (ICC) Elements  
153 of Crimes (2013) [41]. It is important to be aware of overlaps that exist between definitions.  
154 For instance, rape may be considered both domestic and sexual violence, or may be sexual  
155 violence only, depending on the relationship between the person using and the person  
156 experiencing violence. Similarly, intimate partner violence (IPV) is a form of domestic  
157 violence that may or may not include forms of sexual violence. Given the gendered nature of  
158 both domestic and sexual violence, some organisations use the term ‘violence against  
159 women and girls’ to encompass all forms of violence disproportionately experienced by

160 women and girls, including domestic and sexual violence, as well as other forms of violence  
161 that may not be considered domestic or sexual. To illustrate the distinctions and overlaps  
162 between these definitions, we have developed a flowchart using examples of forms of  
163 violence and how they might be categorised (Figure 1).

164

### 165 *Intervention*

166 Any secondary or tertiary prevention support interventions or service will be included, as  
167 these are aimed at those who have already experienced violence [42]. We will include multi-  
168 component interventions and services, and individual or group-based interventions and  
169 services, which may be of any duration. Entry to the intervention or service should be  
170 determined by the experience of DSVAs (either as someone who has experienced or  
171 perpetrated DSVAs). The types of support interventions and services eligible for inclusion  
172 include:

- 173 - Housing-related (refuges, housing workers, resettlement, floating support)
- 174 - Advocacy (advice, advocacy, safety planning, Independent Domestic Violence  
175 Advisers/Advocates (IDVAs), Independent Sexual Violence Advisers/Advocates  
176 (ISVAs))
- 177 - Community-based support (outreach)
- 178 - Psychological support/recovery work (support groups, counselling, befriending/peer  
179 support, group work programmes)
- 180 - Open access support (helplines, drop-in, referrals, online chat services)
- 181 - Legal support
- 182 - Financial support (debt management, help accessing benefit services)
- 183 - Multi-agency risk assessment conferences (MARACs)
- 184 - Police-based DSVAs services

185 Additionally, perpetrator programmes of any nature will be included (see Appendix 1 for  
186 glossary definition). The inclusion of perpetrator programmes is based on several factors.



187 Firstly, including them will allow the measurement of DSVA, including the cessation of  
188 abuse, without placing the burden on people who have experienced DSVA to change their  
189 perpetrators' behaviour. This ties into the UK government's new perpetrator strategy [43],  
190 which intends to place the onus of responses to DSVA on perpetrators changing their  
191 behaviour, alongside the recovery of those who have experienced DSVA. Finally, many  
192 perpetrator programmes offer associated support to (ex)partners or referral to appropriate  
193 support, and measure outcomes relating to their progress as well as that of the perpetrators.

194

195 Primary prevention interventions and services such as awareness raising and education will  
196 be excluded, as participants are not necessarily those who have experienced violence.  
197 Additionally, interventions or services that are not primarily aimed at DSVA will be excluded.  
198 Finally, the provision of online information as an intervention or service where there is no  
199 further contact with a named worker will not be included, because this does not constitute an  
200 active intervention, and may not be accessed only by those who have experienced or used  
201 DSVA.

202

### 203 *Comparator*

204 The comparison intervention will be another included intervention or service, and usual care  
205 (including no support service or intervention or waitlist controls). In the case of pre-post  
206 study designs, studies without a comparison intervention will be included, as the comparison  
207 will be between changes from pre-intervention to post-intervention.

208

### 209 *Outcomes*

210 We will include studies that report data on safety and / or wellbeing. The specific outcomes  
211 and outcome measures will be determined through two processes. Firstly, we will use the  
212 results of the scoping review that we conducted which mapped and charted all outcomes  
213 measuring effectiveness of support interventions and services, and identify the most

214 commonly reported outcome measures. Secondly, we will consult with an advisory group (for  
215 details see Public and Patient Involvement) to determine which of the commonly reported  
216 outcomes identified by the scoping review are most relevant, useful and meaningful. This  
217 approach will ensure that the outcomes of the review are synthesisable, whilst at the same  
218 time ensuring that the review produces meaningful and useful information for third-sector  
219 services and researchers working in this sphere.

220

### 221 *Types of studies*

222 Any type of interventional study, including randomised controlled trials (RCTs), non-  
223 randomised comparative trials, pre-post intervention studies and service evaluations will be  
224 included. Observational study designs, such as case-control, cross-sectional and case  
225 studies will be excluded, as will qualitative studies and theoretical studies.

226

### 227 *Setting*

228 Any UK setting will be included (regardless of the immigration status or nationality of the  
229 service user or the location where the DSVAs were experienced).

230

### 231 *Language*

232 Given the focus of the review on UK-based specialist support services and interventions,  
233 only English language reports will be included.

234

### 235 *Search Strategy*

236 Studies will be retrieved using eight databases: MEDLINE, EMBASE, PsycINFO, Social  
237 Policy and Practice, ASSIA, IBSS, Sociological abstracts and SSCI. Studies published  
238 before 01 January 1982 will not be included. The date limit is based on the year that the  
239 Crime Survey for England and Wales was first introduced. This is because it is hoped that  
240 the results of this review will be integrated with data from this survey as part of a wider

241 programme of work. Searches will include terms relating to violence (e.g., “domestic  
242 violence”, “partner”, “sexual violence” etc.), support services and interventions (e.g.,  
243 “specialist service”, “support”, “outreach”, “refuge” etc.), and the UK (e.g., “United Kingdom”,  
244 “England”, “Wales”, “Scotland”, “London” etc.). The search terms will be combined using the  
245 Boolean operators ‘AND’ and ‘OR’. MeSH terms will also be included. The preliminary  
246 search strategy for MEDLINE can be found in Appendix 3.

247  
248 Grey literature will also be searched for using a three-step strategy. Firstly, four specific grey  
249 literature databases will be searched: National Grey Literature Collection, ETHoS, Social  
250 Care Online and the Violence Against Women Network. Search terms will include: “domestic  
251 violence”, “sexual violence”, “service”, “support” and “intervention”. As above, only studies  
252 published after 01 January 1982 will be included. Secondly, a call for evidence will be  
253 circulated via email to a range of local and national services, service providers and research  
254 networks, to request any relevant service evaluations or reports that will be useful in  
255 answering the review questions and meet the inclusion criteria. Contacts will be emailed  
256 again if there is no initial response after two weeks. Finally, targeted website searching of  
257 relevant UK charities and organisations will take place. Websites will be searched for pages  
258 with links to reports, research, or publications. Titles and descriptions (where applicable) will  
259 be assessed according to the inclusion and exclusion criteria and potentially relevant  
260 documents will be downloaded. Where there are many pages of potentially relevant results,  
261 only the first five pages will be assessed. Where there is a search function, the following  
262 terms will be searched: “Service”, “Evaluation”, “Intervention” and “Report”. Backwards and  
263 forwards citation searching of all included studies will take place to supplement the database  
264 and grey literature searches to identify any further relevant studies.

265

266 Screening of studies

267 Citations for all studies identified in the search will be transferred to Endnote to remove  
268 duplicates, before being uploaded into Rayyan software [44]. Study selection will be  
269 completed in two stages: first titles and abstracts will be screened according to the inclusion  
270 and exclusion criteria; next full texts will be screened to identify studies eligible for inclusion.  
271 Two reviewers will carry out screening independently. Any disagreement will be resolved by  
272 discussion, or with reference to a third reviewer if consensus cannot be reached. Reasons  
273 for exclusion of full texts will be recorded.

274

275 Data extraction

276 Data extraction will take place using a piloted data extraction form and will focus on  
277 characteristics relevant to this review:

- 278 • Methods: study design, authors, date of publication, funding.
- 279 • Setting: country, sector.
- 280 • Participants: gender, age, ethnicity, immigration status, study inclusion and exclusion  
281 criteria, number of participants.
- 282 • Intervention: type of intervention or service, type of comparison, who it was delivered  
283 by.
- 284 • Outcomes: name of outcome, measure of effect (e.g., means and standard  
285 deviations, risk ratios, or number of events), time-points.

286 Two reviewers will be involved in data extraction. One reviewer will extract the data (SC),  
287 and a second will check the extracted data (AB). Any disagreements will be resolved through  
288 discussion. In cases where discussion does not resolve the disagreement, a third reviewer  
289 will be involved. Where data is missing, corresponding authors will be contacted and asked  
290 to supply said data.

291

292 Quality appraisal

293 The risk of bias assessment tool will depend on the type of study. RCTs will be assessed  
294 using the Cochrane Risk of Bias 2 tool [45]. Non-randomised comparative studies and  
295 pre/post intervention studies will be assessed using the ROBINS-I tool [46]. Grey literature  
296 will be assessed using the AACDOS tool [47]. Assessments of bias will be done at the  
297 outcome level.

298

299 Two reviewers (SC and AB) will carry out risk of bias assessments independently.  
300 Assessments will be compared, and any disagreements will be resolved through discussion.  
301 In the case that discussion cannot resolve the disagreement, a third reviewer will be  
302 involved. The risk of bias ratings will not be used to inform the exclusion of studies. Rather,  
303 the assessments will be used to make a statement regarding the quality of the data.

304

305 Data synthesis

306 A narrative synthesis will be conducted to summarise the included services and  
307 interventions, and their impact on the outcomes. The interventions and services will be  
308 described according to the template for intervention description and replication (TiDiER) [48]  
309 if / where appropriate, and grouped according to the different types of interventions (i.e.,  
310 housing, advocacy, community-based, open-access, psychosocial support, legal support,  
311 financial support, MARACs, police-based services, and combinations).

312

313 Where the data permits it (i.e., there are  $\geq 3$  studies reporting the same outcome), meta-  
314 analyses will be conducted using Stata or Review Manager. A random effects model will be  
315 used to generate a pooled risk ratio or (standardised) mean difference. Heterogeneity will be  
316 assessed using the I<sup>2</sup> statistic. Planned subgroup analyses will take place if heterogeneity is  
317 substantial or considerable (defined as I<sup>2</sup> =50-90% and I<sup>2</sup> =75-100%) [49]. This will include:  
318 study design; setting (third sector; private sector; public sector); relationship between the

319 person who has experienced violence and the person who used violence (e.g., (ex)intimate  
320 partner; stranger; domestic but not partner; friend/acquaintance; professional; mixed/any);  
321 the population the service or intervention is aimed at (e.g., those who have experienced  
322 violence; perpetrators of violence; both); type of service or intervention provider (e.g.,  
323 specialist DSVAs; specialist but not DSVAs; non-specialist); and type of violence (e.g.,  
324 primarily DVA focused; primarily SVA focused; combined DSVAs).

325

326 Additionally, sensitivity analyses will be conducted for the following: removal of high risk of  
327 bias studies, and removal of one study at a time. This will allow for exploration of potential  
328 biases. Funnel plots will additionally be produced to assess publication bias if more than 10  
329 studies are identified.

330

331 In the case that meta-analysis is not appropriate, only the narrative synthesis will be  
332 presented and will follow the Synthesis Without Meta-analysis (SWiM) reporting guideline  
333 [50].

334

### 335 Certainty in cumulative evidence

336 Where appropriate (i.e., where data have been pooled), a quality assessment using the  
337 GRADE framework will be used to assess the degree of certainty of the body of evidence.  
338 This takes into account risk of bias, inconsistency, imprecision, indirectness and publication  
339 bias.

340

## 341 Discussion

342 This systematic review will provide an overview of the effect of UK support interventions and  
343 services for DSVAs on the safety and wellbeing of those who have experienced DSVAs. To  
344 our knowledge, this will be the first comprehensive review to collate and compare different  
345 types of support interventions and services in the UK context. By identifying the types of

346 interventions and services producing the biggest impacts on these outcomes, we will help  
347 service providers and organisations across sectors to prioritise limited resources, as well as  
348 provide justification for securing additional funding for such activities.

349

350 The proposed systematic review has strengths that will enhance the comprehensiveness  
351 and robustness of findings. For instance, the inclusion of a comprehensive grey literature  
352 search strategy will allow for identification of reports and evaluations carried out by specialist  
353 support services that are not peer reviewed and may not be publicly available, thus reducing  
354 publication bias and allowing identification of maximal reports. This review also benefits from  
355 the continued contribution from specialist DSVAs who will provide guidance and  
356 advise on the development of the review, as well as aid in its dissemination. Finally, the  
357 review will be methodologically robust, following PRISMA guidelines and involving two  
358 reviewers throughout. However, there are also some limitations that will need to be  
359 considered when interpreting review findings. For instance, the nature of the literature is  
360 likely heterogeneous in terms of both specific services and reporting of these services. This  
361 means that meta-analysis may be unlikely, limiting the review to a narrative synthesis. In  
362 such a case, narrative synthesis remains a useful and insightful approach, and thus we are  
363 confident that the proposed review will produce relevant and informative results. There are  
364 also several strengths and limitations of the evidence we expect to find. For instance, it is  
365 expected that much of the evidence will be based on service evaluations found in the grey  
366 literature. This means that much of the data will be based on real-world evidence, increasing  
367 external validity of review findings. However, as grey literature does not go through a peer  
368 review process, the quality of the evidence may be lower, therefore risk of bias assessments  
369 will be crucial.

370

371 Patient and public involvement

372 An advisory group has been set up comprising six specialist DSVAs organisations who are  
373 involved in the delivery, planning, funding or support of specialist support DSVAs services in  
374 the UK. The group commented on and prioritised aspects to be the focus and scope of this  
375 review, including the population, types of violence and abuse, and defining of support  
376 services and interventions, as well as the design of this protocol. For example, as a result of  
377 the group's feedback, the scope of the review was broadened from support services and  
378 interventions provided only by DSVAs organisations, to include any support services and  
379 interventions for people who have experienced DSVAs regardless of UK setting. They will  
380 continue to be involved throughout the review process to consult on data extraction,  
381 interpretation and dissemination of findings.

382

383 Ethics and dissemination

384 Ethical approval is not applicable for this study since no original data will be collected. The  
385 results will be disseminated through peer-reviewed publications, and conference  
386 presentations, and non-academic outputs tailored to end user groups. Our advisory group  
387 will be consulted for additional sources through which to disseminate findings.

388

389 **Authors' contributions:** All authors contributed to the conceptualisation of the study  
390 protocol. SC produced the first draft of the study protocol and the manuscript. All co-authors  
391 reviewed the manuscript and approved the final version.

392

393 **Competing interests statement:** None declared.

394



## 395 References

- 396 1. Office for National Statistics (ONS), *Domestic abuse prevalence and victim characteristics*  
397 *Year ending March 2022*, Office for National Statistics (ONS), Editor. 2022.
- 398 2. Office for National Statistics (ONS), *Sexual offences in England and Wales overview: year*  
399 *ending March 2020*. 2021.
- 400 3. Walby, S., *The cost of domestic violence*. 2004.
- 401 4. McManus, S., et al., *Intimate partner violence, suicidality, and self-harm: a probability*  
402 *sample survey of the general population in England*. *The Lancet Psychiatry*, 2022. **9**(7): p.  
403 574-583.
- 404 5. Herbert, A., et al., *Risk factors for intimate partner violence and abuse among adolescents*  
405 *and young adults: findings from a UK population-based cohort*. Wellcome open research,  
406 2020. **5**.
- 407 6. Fulu, E., et al., *Prevalence of and factors associated with male perpetration of intimate*  
408 *partner violence: findings from the UN Multi-country Cross-sectional Study on Men and*  
409 *Violence in Asia and the Pacific*. *The lancet global health*, 2013. **1**(4): p. e187-e207.
- 410 7. Basile, K.C., et al., *National intimate partner and sexual violence survey: 2010 summary*  
411 *report*. 2011.
- 412 8. Breiding, M.J., M.C. Black, and G.W. Ryan, *Chronic disease and health risk behaviors*  
413 *associated with intimate partner violence—18 US states/territories, 2005*. *Annals of*  
414 *epidemiology*, 2008. **18**(7): p. 538-544.
- 415 9. Chandan, J.S., et al., *Risk of cardiometabolic disease and all-cause mortality in female*  
416 *survivors of domestic abuse*. *Journal of the American Heart Association*, 2020. **9**(4): p.  
417 e014580.
- 418 10. Crofford, L.J., *Violence, stress, and somatic syndromes*. *Trauma, Violence, & Abuse*, 2007.  
419 **8**(3): p. 299-313.
- 420 11. John, R., et al., *Domestic violence: prevalence and association with gynaecological*  
421 *symptoms*. *BJOG: An International Journal of Obstetrics & Gynaecology*, 2004. **111**(10): p.  
422 1128-1132.
- 423 12. Leserman, J. and D.A. Drossman, *Relationship of abuse history to functional gastrointestinal*  
424 *disorders and symptoms: some possible mediating mechanisms*. *Trauma, Violence, & Abuse*,  
425 2007. **8**(3): p. 331-343.
- 426 13. Tjaden, P. and N. Thoennes, *Prevalence and consequences of male-to-female and female-to-*  
427 *male intimate partner violence as measured by the National Violence Against Women*  
428 *Survey*. *Violence against women*, 2000. **6**(2): p. 142-161.
- 429 14. Povey, D., et al., *Homicides, Firearm Offences and Intimate Violence 2006/07 (Supplementary*  
430 *Volume 2 to Crime in England and Wales 2006/07) Home Office Statistical Bulletin 03/08*  
431 *[online]*. London: Home Office Research Development and Statistics Directorate. 2008.
- 432 15. Jonas, S., et al., *Gender differences in intimate partner violence and psychiatric disorders in*  
433 *England: results from the 2007 adult psychiatric morbidity survey*. *Epidemiology and*  
434 *psychiatric sciences*, 2014. **23**(2): p. 189-199.
- 435 16. McManus, S., et al., *Receiving threatening or obscene messages from a partner and mental*  
436 *health, self-harm and suicidality: results from the Adult Psychiatric Morbidity Survey*. *Social*  
437 *psychiatry and psychiatric epidemiology*, 2021: p. 1-11.
- 438 17. Women's Aid, *The Domestic Abuse Report 2019: The Economics of Abuse Report Summary*.  
439 2019.
- 440 18. St. Mungo's, *Rebuilding Shattered Lives [online]*. 2014.
- 441 19. Scott, S. and S. McManus, *Hidden hurt: violence, abuse and disadvantage in the lives of*  
442 *women*. Agenda, London, 2016.
- 443 20. Crown Prosecution Service, *Violence against Women and Girls Report 10th Edition 2016-17*.  
444 2017.

- 445 21. Office for National Statistics (ONS), *Domestic abuse and the criminal justice system*. 2021.
- 446 22. ONS, *Domestic abuse in England and Wales overview: November 2021. Figures on domestic*  
447 *abuse from police recorded crime and a number of different organisations*. 2021.
- 448 23. Oliver, R., et al., *The economic and social costs of domestic abuse*. Home Office: London, UK,  
449 2019.
- 450 24. Yakubovich, A.R., et al., *Housing interventions for women experiencing intimate partner*  
451 *violence: a systematic review*. The Lancet Public Health, 2021.
- 452 25. Kiani, Z., et al., *A systematic review: Empowerment interventions to reduce domestic*  
453 *violence? Aggression and Violent Behavior*, 2021. **58**: p. 101585.
- 454 26. Rivas, C., et al., *Advocacy interventions to reduce or eliminate violence and promote the*  
455 *physical and psychosocial well-being of women who experience intimate partner abuse: A*  
456 *systematic review*. Campbell Systematic Reviews, 2016. **12**(1): p. 1-202.
- 457 27. Hameed, M., et al., *Psychological therapies for women who experience intimate partner*  
458 *violence*. Cochrane database of systematic reviews, 2020(7).
- 459 28. Lilley-Walker, S.-J., M. Hester, and W. Turner, *Evaluation of European domestic violence*  
460 *perpetrator programmes: Toward a model for designing and reporting evaluations related to*  
461 *perpetrator treatment interventions*. International journal of offender therapy and  
462 comparative criminology, 2018. **62**(4): p. 868-884.
- 463 29. Akoensi, T.D., et al., *Domestic violence perpetrator programs in Europe, Part II: A systematic*  
464 *review of the state of evidence*. International journal of offender therapy and comparative  
465 criminology, 2013. **57**(10): p. 1206-1225.
- 466 30. Solar, O. and A. Irwin, *A conceptual framework for action on the social determinants of*  
467 *health*. 2010, WHO Document Production Services.
- 468 31. Campbell, J. and J. Humphreys, *Nursing care of survivors of family violence*. 1993: Mosby  
469 Incorporated.
- 470 32. Carlisle, S., et al., *Trends in outcomes used to measure the effectiveness of UK-based support*  
471 *interventions and services targeted at adults with experience of domestic and sexual violence*  
472 *and abuse: A scoping review*. Submitted.
- 473 33. Campbell, J.C. and K.L. Soeken, *Women's responses to battering over time: an analysis of*  
474 *change*. Journal of Interpersonal violence, 1999. **14**(1): p. 21-40.
- 475 34. Shamseer, L., et al., *Preferred reporting items for systematic review and meta-analysis*  
476 *protocols (PRISMA-P) 2015: elaboration and explanation*. BMJ : British Medical Journal,  
477 2015. **349**: p. g7647.
- 478 35. Moher, D., et al., *Preferred reporting items for systematic reviews and meta-analyses: the*  
479 *PRISMA statement*. BMJ, 2009. **339**: p. b2535.
- 480 36. National Institute For, H. and E. Care, *Domestic violence and abuse (QS116)*. 2016, London:  
481 National Institute for Health and Care Excellence. 33.
- 482 37. Home Office. *Circular 003/2013: new government domestic violence and abuse definition*.  
483 2013; Available from: [https://www.gov.uk/government/publications/new-government-](https://www.gov.uk/government/publications/new-government-domestic-violence-and-abuse-definition/circular-0032013-new-government-domestic-violence-and-abuse-definition)  
484 [domestic-violence-and-abuse-definition/circular-0032013-new-government-domestic-](https://www.gov.uk/government/publications/new-government-domestic-violence-and-abuse-definition/circular-0032013-new-government-domestic-violence-and-abuse-definition)  
485 [violence-and-abuse-definition](https://www.gov.uk/government/publications/new-government-domestic-violence-and-abuse-definition/circular-0032013-new-government-domestic-violence-and-abuse-definition).
- 486 38. *Domestic Abuse Act*. 2021.
- 487 39. Council of Europe, *Council of Europe Convention on preventing and combating violence*  
488 *against women and domestic violence (CETS No. 210)*. 2011.
- 489 40. Krug, E.G., et al., *The world report on violence and health*. The lancet, 2002. **360**(9339): p.  
490 1083-1088.
- 491 41. International Criminal Court, *Elements of Crime*. 2013.
- 492 42. García-Moreno, C., et al., *The health-systems response to violence against women*. The  
493 Lancet, 2015. **385**(9977): p. 1567-1579.
- 494 43. Home Office, *Policy Paper: Tackling perpetrators*. 2022.

- 495 44. Ouzzani, M., et al., *Rayyan — a web and mobile app for systematic reviews*. Systematic  
496 Reviews, 2016. **5**(210).
- 497 45. Sterne, J.A., et al., *RoB 2: a revised tool for assessing risk of bias in randomised trials*. *bmj*,  
498 2019. **366**.
- 499 46. Sterne, J.A., et al., *ROBINS-I: a tool for assessing risk of bias in non-randomised studies of*  
500 *interventions*. *bmj*, 2016. **355**.
- 501 47. Tyndall, J., *AACODS Checklist*. 2010, Flinders University.
- 502 48. Hoffmann, T.C., et al., *Better reporting of interventions: template for intervention description*  
503 *and replication (TIDieR) checklist and guide*. *BMJ : British Medical Journal*, 2014. **348**: p.  
504 g1687.
- 505 49. Higgins, J.P., et al., *Cochrane handbook for systematic reviews of interventions*. 2019: John  
506 Wiley & Sons.
- 507 50. Campbell, M., et al., *Synthesis without meta-analysis (SWiM) in systematic reviews: reporting*  
508 *guideline*. *bmj*, 2020. **368**.

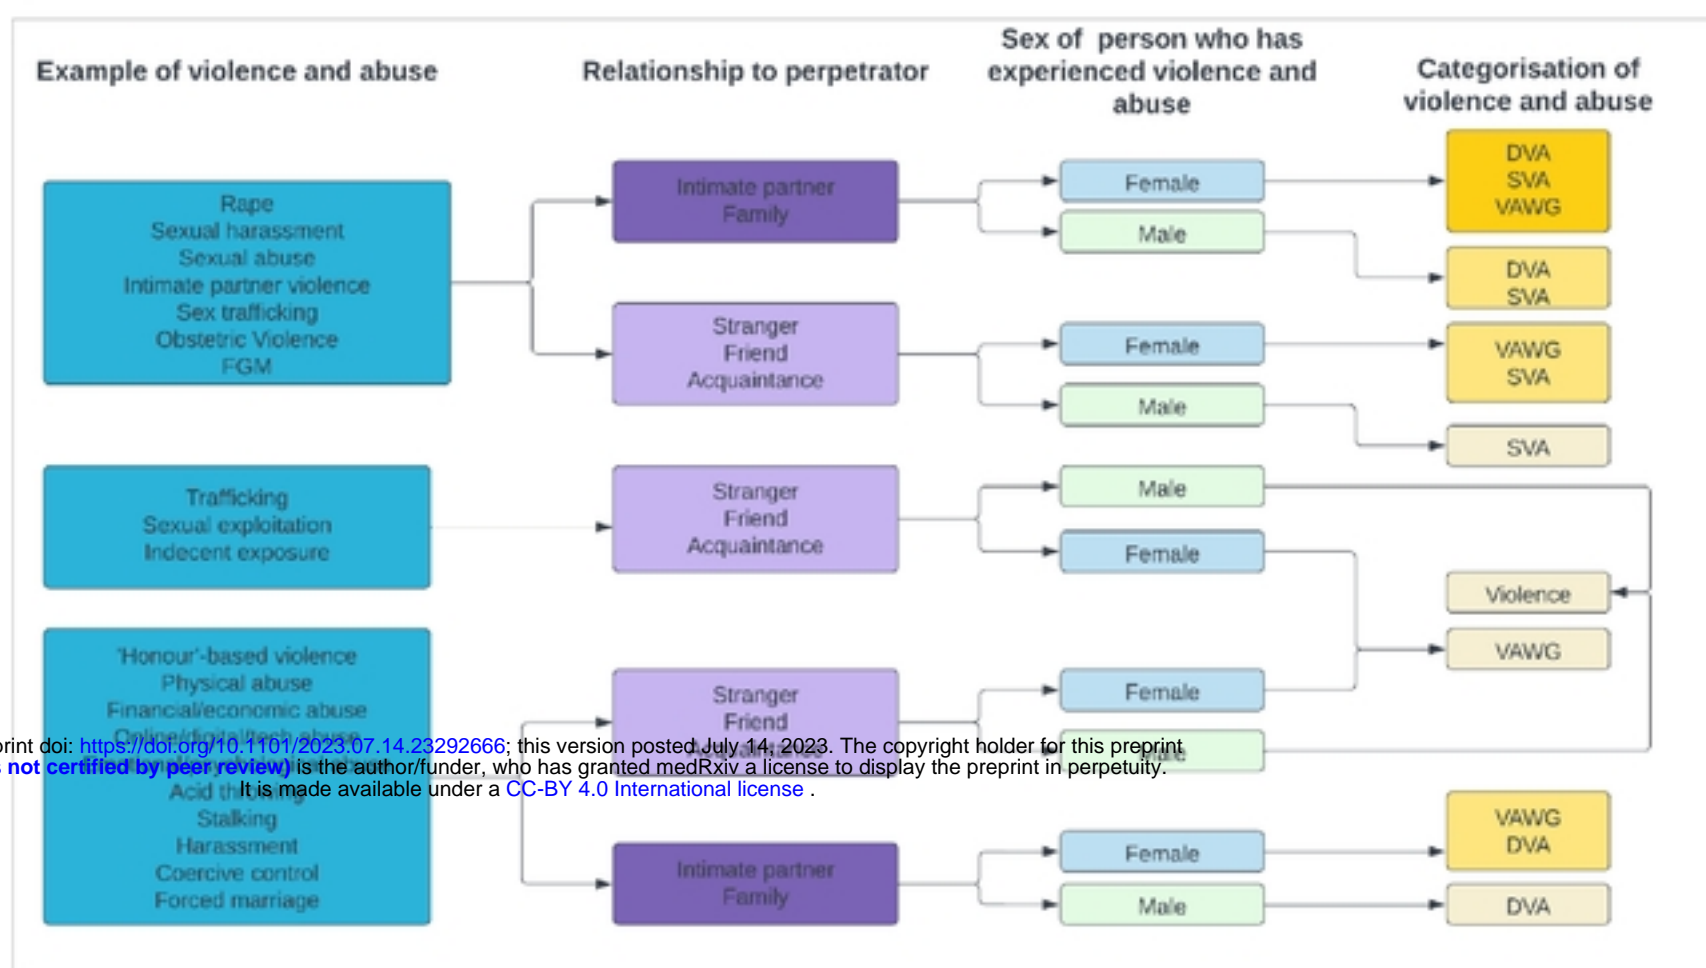

medRxiv preprint doi: <https://doi.org/10.1101/2023.07.14.23292666>; this version posted July 14, 2023. The copyright holder for this preprint (which was not certified by peer review) is the author/funder, who has granted medRxiv a license to display the preprint in perpetuity. It is made available under a [CC-BY 4.0 International license](https://creativecommons.org/licenses/by/4.0/).

**Figure 1.** Flow chart to illustrate the relationship between forms of violence, the relationship between person who has experienced violence and perpetrator, the sex of the person who has experienced violence, and the categorisation of the form of violence. Note that these are examples, and this is not an exhaustive list. DVA: domestic violence and abuse; FGM: female genital mutilation; SVA: sexual violence and abuse; VAWG: Violence against women and girls.
